# Supplementary material for: The two-component system CepRS regulates the cephamycin C biosynthesis in Streptomyces clavuligerus F613-1
Source: PubMed Central journal article supplement (PMC6661058; doi:10.1186/s13568-019-0844-z), 2019-07-27
Supplement: 13568_2019_844_MOESM1_ESM.pdf [file 13568_2019_844_MOESM1_ESM.pdf]

## Additional file 1

**Journal name:** AMB Express

**Article title:** The two-component system CepRS regulates the cephamycin C biosynthesis in

*Streptomyces clavuligerus* F613-1

**Author names:** Jiafang Fu<sup>1, 2†</sup>, Ronghuo Qin<sup>1†</sup>, Gongli Zong<sup>1, 2</sup>, Chuanqing Zhong<sup>3</sup>, Peipei Zhang<sup>1, 2</sup>, Ni Kang<sup>1</sup>, Xiaoyu Qi<sup>3</sup>, Guangxiang Cao<sup>1, 2\*</sup>

<sup>1</sup> Shandong Medicinal Biotechnology Center, Shandong First Medical University & Shandong Academy of Medical Sciences, Jinan 250062, China

<sup>2</sup> Key Laboratory for Biotech-Drugs of National Health Commission, Jinan 250062, China

<sup>3</sup> School of Municipal and Environmental Engineering, Shandong Jianzhu University, Jinan 250101, China

<sup>†</sup>Jiafang Fu and Ronghuo Qin have contributed equally.

\*Corresponding author: Guangxiang Cao, [caozhong0402@163.com](mailto:caozhong0402@163.com)

Tel.: +86 531 8291 9606; Fax: +86 531 8291 9645

Shandong Medicinal Biotechnology Center,

Shandong First Medical University & Shandong Academy of Medical Sciences,

Jingshi Road 18877, Jinan 250062, Shandong, China.

## Captions

1. Table S1 Plasmids and strains used in this study.
2. Table S2 Primers used in this study.
3. Figure S1. (A) Polymerase chain reaction-based verification of the  $\Delta cepS$  and  $\Delta cepR$  strains. M: DNA marker. (B) Phenotype of F613-1,  $\Delta cepRS$ ,  $\Delta cepR$ ,  $\Delta cepS$  and  $\Delta cepRS$  on BSCA solid media. (C) Ceph C (cephamycin C) obtained in F613-1,  $\Delta cepRS$ ,  $\Delta cepR$  and  $\Delta cepS$  strains on TSA solid medium. \*, statistically significant difference ( $P < 0.05$ ) between  $\Delta cepRS$ ,  $\Delta cepR$ ,  $\Delta cepS$  and F613-1 at the same time point.
4. Figure S2. Biomass and clavulanic acid (CA) concentration of F613-1,  $\Delta cepRS$  and the complemented strain. A: Growth curves of F613-1,  $\Delta cepRS$  and  $\Delta cepRScom$  in SCF fermentation medium. Samples for growth curve analysis were harvested at five time points (1, 3, 5, 7 and 9 d). Data are the mean  $\pm$  SD of three independent experiments. B: Analysis of the change of CA concentration during fermentation. Data are the mean  $\pm$  SD of three independent biological experiments.
5. Figure S3. Expression of genes in the CA biosynthetic gene cluster were examined by RT-qPCR between F613-1 (black bars),  $\Delta cepRS$  (grey bars) and  $\Delta cepRScom$  (dark grey bars). Results were normalized for 16S rRNA gene content and are shown as fold change over the F613-1 control. Data are the mean  $\pm$  SD of three independent biological experiments.
6. Figure S4. A: Phenotype of F613-1,  $\Delta cepRS$ ,  $\Delta cepRScom$  and  $\Delta cepRS-cepRS$  (over-expression strain) on BSCA solid media. B: Cephamycin C obtained in F613-1,  $\Delta cepRS$  and  $\Delta cepRS-cepRS$  (over-expression strain) strains on TSA solid medium. \*, compared with F 613-1,  $P < 0.05$ . Data are the mean  $\pm$  SD of three independent biological experiments. C: Expression of genes in the cephamycin C biosynthetic gene cluster were examined by RT-qPCR between F613-1 (black bars),  $\Delta cepRS$  (grey bars) and  $\Delta cepRS-cepRS$  (over-expression strain) (dark grey bars). Results were normalized for 16S rRNA gene content and are shown as fold change over the F613-1 control. \*, compared with F613-1,  $P < 0.05$ . Data are the mean  $\pm$  SD of three independent biological experiments.

**Table S1 Plasmids and strains used in this study.**

| Strains or plasmids                             | Description                                                                                                      | Source/Reference     |
|-------------------------------------------------|------------------------------------------------------------------------------------------------------------------|----------------------|
| <b><i>Streptomyces clavuligerus</i> strains</b> |                                                                                                                  |                      |
| F613-1                                          | Industrial clavulanic acid producer                                                                              | (Qin 2017)           |
| $\Delta cepRS$                                  | F613-1 mutant with <i>cepRS</i> double-gene deletion                                                             | This study           |
| $\Delta cepR$                                   | F613-1 mutant with <i>cepR</i> gene deletion                                                                     | This study           |
| $\Delta cepS$                                   | F613-1 mutant with <i>cepS</i> gene deletion                                                                     | This study           |
| $\Delta cepRScom$                               | $\Delta cepRS$ complemented with <i>cepRS</i>                                                                    | This study           |
| $\Delta cepRS-cepRS$                            | $\Delta cepRS$ overexpressed with <i>cepRS</i>                                                                   | This study           |
| $\Delta cepRScom$ -pSET152                      | $\Delta cepRS$ complemented with the empty vector pSET152                                                        | This study           |
| <b><i>E. coli</i> strains</b>                   |                                                                                                                  |                      |
| DH5 $\alpha$                                    | General cloning host                                                                                             | Trans (China)        |
| BL21 (DE3)                                      | Strain used for protein expression                                                                               | Trans (China)        |
| <i>E. coli</i> ESS 2235                         | a supersensitive organism to beta-lactam antibiotics                                                             | (Leite et al. 2016)  |
| ET12567/pUZ8002                                 | Strain used for conjugation between <i>E. coli</i> and <i>Streptomyces</i> spp                                   | (Kieser et al. 2000) |
| <b>Plasmids</b>                                 |                                                                                                                  |                      |
| pJTU1278                                        | <i>E. coli</i> - <i>Streptomyces</i> shuttle vector, <i>tsr</i> <sup>a</sup> <i>bla</i> <sup>a</sup> <i>oriT</i> | (He et al. 2010)     |
| pHLY12                                          | <i>Streptomyces</i> overexpression vector with the strong promoter ermEp                                         | Preserved in our lab |
| pHLY-cepRS                                      | pHLY12 containing the coding sequence of <i>cepRS</i>                                                            | This study           |
| pSET152                                         | <i>Streptomyces</i> integrated vector                                                                            | BioVector (China)    |
| pET-15b                                         | Expression vector containing the T7 promoter and 6 $\times$ His-thrombin                                         | Novagene (USA)       |
| pSET-cepRS                                      | pSET152 containing the coding sequence of <i>cepRS</i> plus <i>cepR</i> upstream intergenic sequence             | This study           |
| pET-cepR                                        | pET15b containing the coding sequence of <i>cepR</i>                                                             | This study           |
| pEasy-Blunt-Simple                              | General cloning vector                                                                                           | Trans (China)        |
| pJTU-cepR                                       | pJTU1278 containing the <i>cepR</i> -disrupted cassette                                                          | This study           |
| pJTU-cepS                                       | pJTU1278 containing the <i>cepS</i> -disrupted cassette                                                          | This study           |
| pJTU-cepRS                                      | pJTU1278 containing the <i>cepRS</i> -disrupted cassette                                                         | This study           |

<sup>a</sup> *tsr*, thiostrepton-resistance gene; *bla*, ampicillin-resistance gene.

**Table S2 Primers used in this study.**

| <b>Oligonucleotides</b>                                                                                                                | <b>DNA Sequence (5'→3')*</b>                     |
|----------------------------------------------------------------------------------------------------------------------------------------|--------------------------------------------------|
| <b>Recombinant plasmid pJTU-cepRS, pJTU-cepS, pJTU-cepR construction</b>                                                               |                                                  |
| <i>cepRS</i> L-F                                                                                                                       | GG <u>ACTAGT</u> ACCACATAGGAACGGGTA              |
| <i>cepRS</i> L-R                                                                                                                       | CCTCTAGAAATGCA <u>AAGCTT</u> GTGAAGACCTATGTGAGCC |
| <i>cepRS</i> R-F                                                                                                                       | GGA <u>AAGCTT</u> GATCTCCACGAGGATCATGC           |
| <i>cepRS</i> R-R                                                                                                                       | CGTCTAGAGGAAACAGCCGAAACAG                        |
| <i>cepR</i> R-F                                                                                                                        | GG <u>ACTAGT</u> AGTCACCCTCACTCAGCC              |
| <i>cepR</i> R-R                                                                                                                        | CCTCTAGAAATGCA <u>AAGCTT</u> TGCACGCCCTTCAGGAGC  |
| <i>cepS</i> L-F                                                                                                                        | GG <u>ACTAGT</u> TTCCCCACTGCTTCGGC               |
| <i>cepS</i> L-R                                                                                                                        | CCTCTAGAAATGCA <u>AAGCTT</u> AGGTGGAGGGCTGATCCG  |
| <b>Validation of <math>\Delta</math>cepRS, <math>\Delta</math>cepS, <math>\Delta</math>cepR and <math>\Delta</math>cepRScom strain</b> |                                                  |
| <i>cepRS</i> V-F                                                                                                                       | CTGCACCCGGTTCTCGCA                               |
| <i>cepRS</i> V-R                                                                                                                       | GTGAAGCTCTCATCCTCGA                              |
| <b>Recombinant plasmid pSET-cepRS construction</b>                                                                                     |                                                  |
| <i>cepRScom</i> -F                                                                                                                     | GGCTGCAGGTCGACTCTAGACCTCGTCGTCCGCCCCGCTC         |
| <i>cepRScom</i> -R                                                                                                                     | TCGCGCGCGGCCGCGGATCCCCATGCATCGCCGGGGTCCA         |
| Recombinant plasmid pHLY-cepRS construction                                                                                            |                                                  |
| <i>cepRS</i> -F                                                                                                                        | GGAATTCCATATGCGGATCGGCGCCCCGTCAT                 |
| <i>cepRS</i> -R                                                                                                                        | CTAGTCTAGACCGCCGAGACCGGGGTGTGA                   |
| <b>Recombinant plasmid pET-cepR construction</b>                                                                                       |                                                  |
| <i>cepRHis</i> -F                                                                                                                      | <u>CATATG</u> ACGGGGGCGCCGATCCGGGTGGTCATCGCC     |
| <i>cepRHis</i> -R                                                                                                                      | <u>CTCGAGT</u> CAGCCCACGCCAGACCCGCGTCCCGCGC      |
| <b>EMSAs</b>                                                                                                                           |                                                  |
| cmcI-cefD p1 For                                                                                                                       | TCGTTCAATTGCCCTCTTCCTTGAGTG                      |
| cmcI-cefD p1 Rev                                                                                                                       | ATGGTCGTCCGATCGCCGCA                             |
| cmcI-cefD p2 For                                                                                                                       | CGCCGTTGTGCACCCATGGG                             |
| cmcI-cefD p2 Rev                                                                                                                       | CCCAGTCGGCTACCGCCATGTC                           |
| cmcI-cefD p3 For                                                                                                                       | TGCGGCGATCGGACGACCAT                             |
| cmcI-cefD p3 Rev                                                                                                                       | CCCATGGGTGCACAACGGCG                             |
| lat p For1                                                                                                                             | GCCCATGGGTGAGAACTCCTGGG                          |
| lat p Rev1                                                                                                                             | CGGTCCCAGGCTTCGATGGC                             |
| lat p For2                                                                                                                             | GCCATCGAAGCCTGGGACCG                             |
| lat p Rev2                                                                                                                             | CAACTGCCCTGAAGCGGGCC                             |
| ccaR For1                                                                                                                              | TGGCTTCGGCGTAATCCTTG                             |

---

|                |                       |
|----------------|-----------------------|
| ccaR Rev1      | CTGTCCCAAATCGTCCATGC  |
| ccaR For2      | TCGGTGAACCCGGAAGAACC  |
| ccaR Rev2      | TTTGCCGAGGATTTCCGGAC  |
| orf10 For1     | TTTGAGTACCGTCCGCCGCC  |
| orf10 Rev1     | TTCCTCACACAGAGCAGACC  |
| orf10 For2     | GGTCTGCTCTGTGTGAGGAA  |
| orf10 Rev2     | GTTTCCCTGAACCAACGCTG  |
| pcbAB For      | CATCATTCGTGGGCTCTCCG  |
| pcbAB Rev      | TGGCGAGCAGTGTACGGCG   |
| cmcT For       | GCATGCCGCACGGATGACGC  |
| cmcT Rev       | CAGCGGAACTCCCTCGCATG  |
| pbpA For       | TACCAGCGGAAGGAGGCACC  |
| pbpA Rev       | CTGTCTCCTTCATACGCCGC  |
| <b>RT-qPCR</b> |                       |
| 16S-RT For     | GAGATCCGCCTTCGCCACCG  |
| 16S-RT Rev     | CTGCATTCGATACGGGCAGGC |
| pcbR-F         | CCAACCTCAAGCCGACGAAG  |
| pcbR-R         | ACGCGACCTTCCACTCCTTG  |
| pcbC-F         | TGACCGACCAGGAGAAGCAC  |
| pcbC-R         | GACCGCCTTGTAGTAGCCGT  |
| pcbAB-F        | GCCTATCTCACCTACACCTC  |
| pcbAB-R        | AGCGTCTGCCCCGTTGATGAG |
| lat-F          | AGGCACTTGAGCAGCATATG  |
| lat-R          | ATGCTGGGCGGGTTGATTCC  |
| blp-F          | ATGGTGAAGAAGACATGGAG  |
| blp-R          | TGGTCGGCACCGGCGAGCTG  |
| orf10-F        | CCGATGTCCCGCAGTTGTTG  |
| orf10-R        | CCTGGATGACGTCGTCGATC  |
| ccaR-F         | TTCGCGGATGTGACCTCCAG  |
| ccaR-R         | TCATCAGGCTCACATACAGG  |
| cmcH-F         | GTTCTTCACCTCCACGCACG  |
| cmcH-R         | CCGAAGAGGAAGGAGTAGCG  |
| cefF-F         | TCTTCAACCTCGCCGCACTG  |
| cefF-R         | AAGAAGTCCATCGCCGTGTC  |
| cmcJ-F         | ACGCGGTGGAGTTCTTCGAC  |

---

---

|               |                       |
|---------------|-----------------------|
| cmcJ-R        | TCGACGTGCACCCGCAGATG  |
| cmcI-F        | CCCACGCCAACACCTTCAAC  |
| cmcI-R        | CGATGATGAAGTAGTCGCCC  |
| cefD-F        | CCACCGTCGTCAACCTCAAC  |
| cefD-R        | AGCAGGAAGTCCATCGGCTC  |
| cefE-F        | CACCCTCATCCAGCAGACAC  |
| cefE-R        | TGCCCGCTATCTGGTCCCTG  |
| pcd-F         | TCACCGAGCACAAACAGGAC  |
| pcd-R         | TCGCAGATGTCGATCATCTC  |
| cmcT-F        | AGGTGCCGCTCTGGTACTTC  |
| cmcT-R        | AGCGAGACCAGCAGCATGAC  |
| pbp74-F       | AGAGGGGTTCGAAAAGGCTG  |
| Pbp74-R       | GCTCCGGCTTCGGCTCCTTG  |
| bla-F         | TCGCCTTCTGCTCCACGTTC  |
| bla-R         | GGTGAGATCGAGTCGACGTC  |
| gcas-RT For   | CACCCCTGGCCGACTATGCC  |
| gcas-RT Rev   | GCCCGTGGGTGTACCAGGAC  |
| orf16-RT For  | CACCGTCTGCTTCCCGCACG  |
| orf16-RT Rev  | GCGGTGCTTGGTCATGTCCG  |
| oppA2-RT For  | ACGTCTGGGTGTGGCTGCTC  |
| oppA2-RT Rev  | GCAGCCGGTAGGTCCAGGTC  |
| orf14-RT For  | CGGCCAACGACGACGAAACG  |
| orf14-RT Rev  | CCAGTCGTCGAGGGCGGTC   |
| orf13-RT For  | TCCTCTCCGCGATGCGGTTC  |
| orf13-RT Rev  | GCATGCCGATGTCGATGGCG  |
| orf12-RT For  | AGGGCCGACAAGGAGCGATG  |
| orf12-RT Rev  | GTCCGGACGAGGTCAGCAGC  |
| fd-RT For     | GCCCCGAGATCTTCGACCAG  |
| fd-RT Rev     | TAGCCCTCGGTGACCGTGAT  |
| cyp450-RT For | AGCCAGGTGTGGCTGGTGAC  |
| cyp450-RT Rev | GCGGATGAACGACGCCGACT  |
| cad-RT For    | CCGACTGGACCCGGATGATCG |
| cad-RT Rev    | TTCGTGGCCTGGTAGACGGC  |
| claR-RT For   | TGCTGTCGCTGGTCTCCACG  |
| claR-RT Rev   | TAGGCCGCGTCCACCTGGTA  |

---

---

|              |                        |
|--------------|------------------------|
| oppA2-RT For | ACGTCTGGGTGTGGCTGCTC   |
| oppA2-RT Rev | GCAGCCGGTAGGTCCAGGTC   |
| oat2-RT For  | CGACTTCACCGTCCTCGCCT   |
| oat2-RT Rev  | GGTCGCGACATTCGCGTTGC   |
| cas2-RT For  | CTCCGAGCTTCCCGAGGTGC   |
| cas2-RT Rev  | CGCGCAGCAGCAGATAACCG   |
| pah2-RT For  | ACGGCGCAGAGCCATCTGTC   |
| pah2-RT Rev  | TTGGTGTCCGGAGTGC GCGTC |
| bls2-RT For  | TGCCGCTGTACACCTGTGTGG  |
| bls2-RT Rev  | CGCGGGCACCTGGTAGACAC   |
| ceaS2-RT For | AGGCCGCGTCGATTCTCTTCG  |
| ceaS2-RT Rev | AGAGGTTGGTCATACCGGGGC  |
| cas1-RT For  | GAGGACCGCTCCCTGCTGAC   |
| cas1-RT Rev  | CTCCGAGGACAGGTGGTGCG   |

---

\* Restriction enzyme sites are underlined and were used for cloning purposes.

Figure S1

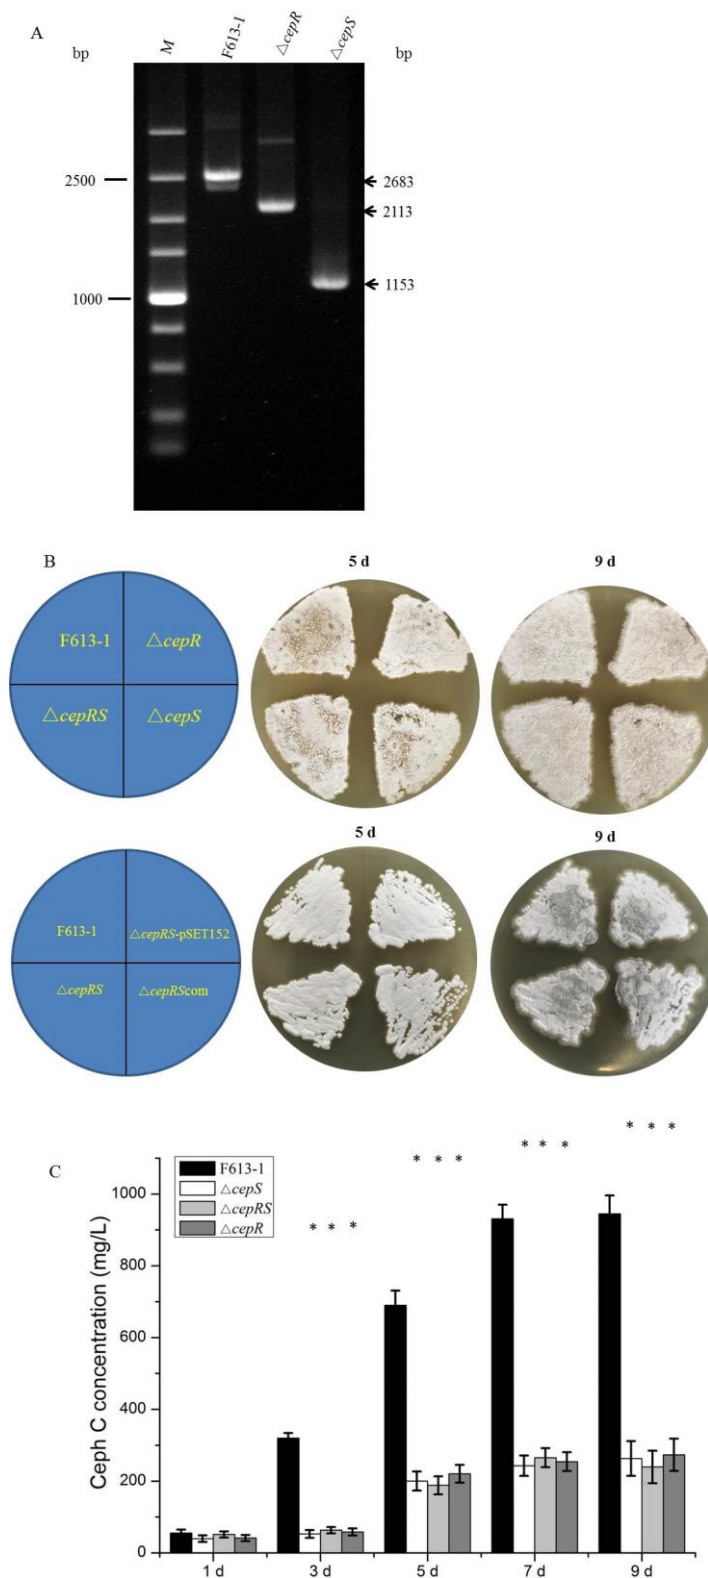

**Figure S1.** (A) Polymerase chain reaction-based verification of the  $\Delta cepS$  and  $\Delta cepR$  strains. M: DNA marker. (B) Phenotype of F613-1,  $\Delta cepRS$ ,  $\Delta cepR$ ,  $\Delta cepS$  and  $\Delta cepRS$  on BSCA solid media. (C) Ceph C (cephamycin C) obtained in F613-1,  $\Delta cepRS$ ,  $\Delta cepR$  and  $\Delta cepS$  strains on TSA solid medium. \*, statistically significant difference ( $P < 0.05$ ) between  $\Delta cepRS$ ,  $\Delta cepR$ ,  $\Delta cepS$  and F613-1 at the same time point.



Figure S2

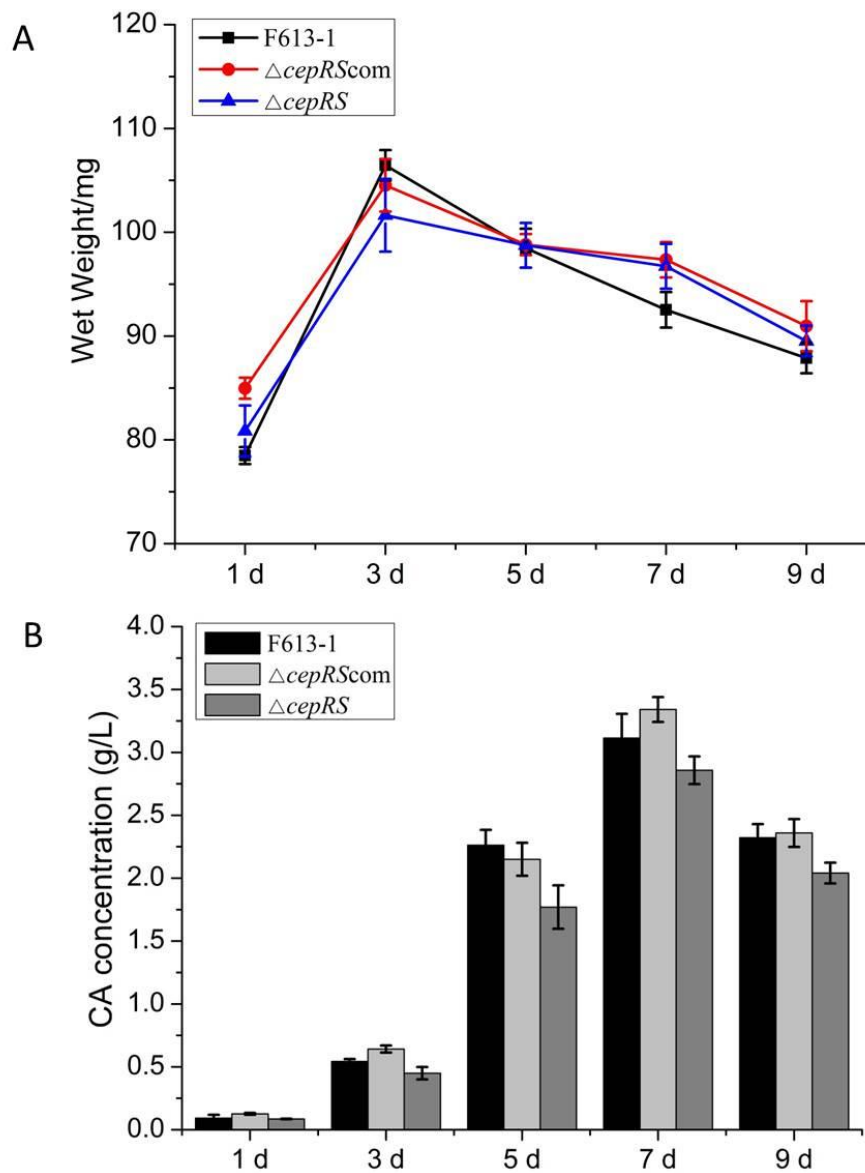

**Figure S2.** Biomass and clavulanic acid (CA) concentration of F613-1,  $\Delta cepRS$  and the complemented strain. **A:** Growth curves of F613-1,  $\Delta cepRS$  and  $\Delta cepRScom$  in SCF fermentation medium. Samples for growth curve analysis were harvested at five time points (1, 3, 5, 7 and 9 d). Data are the mean  $\pm$  SD of three independent experiments. **B:** Analysis of the change of CA concentration during fermentation. Data are the mean  $\pm$  SD of three independent biological experiments.

Figure S3

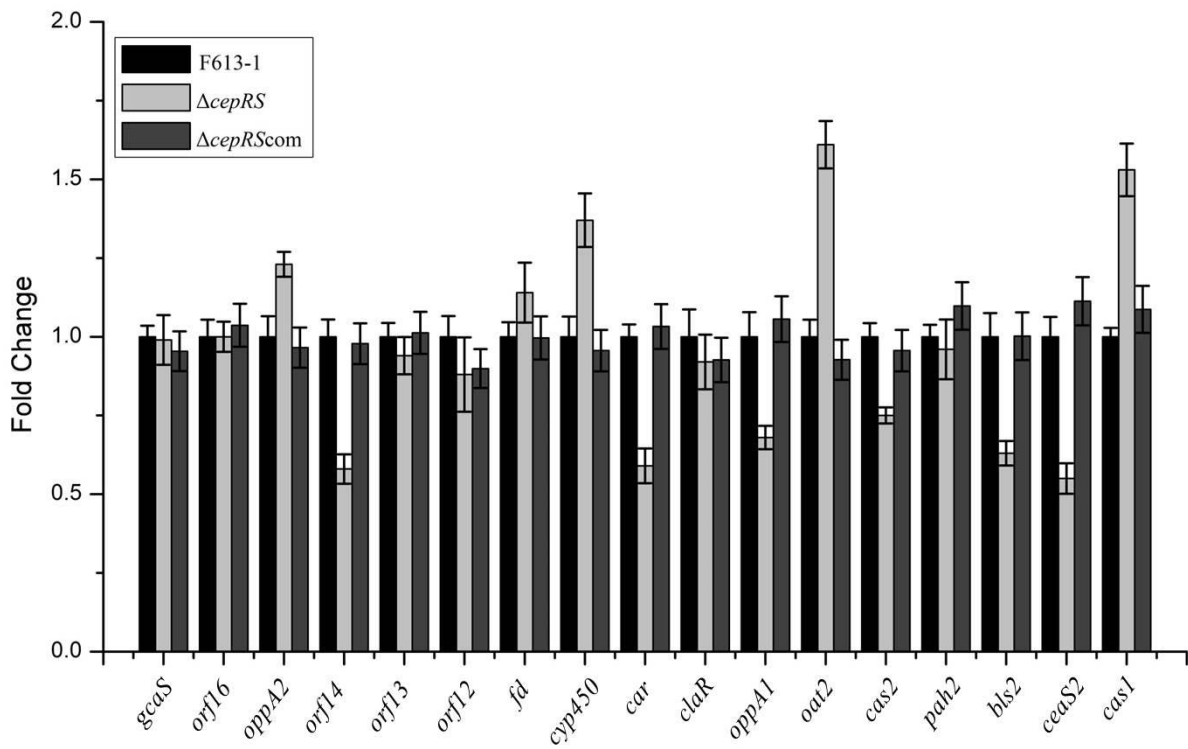

**Figure S3.** Expression of genes in the CA biosynthetic gene cluster were examined by RT-qPCR between F613-1 (black bars),  $\Delta cepRS$  (grey bars) and  $\Delta cepRScom$  (dark grey bars). Results were normalized for 16S rRNA gene content and are shown as fold change over the F613-1 control. Data are the mean  $\pm$ SD of three independent biological experiments.

Figure S4

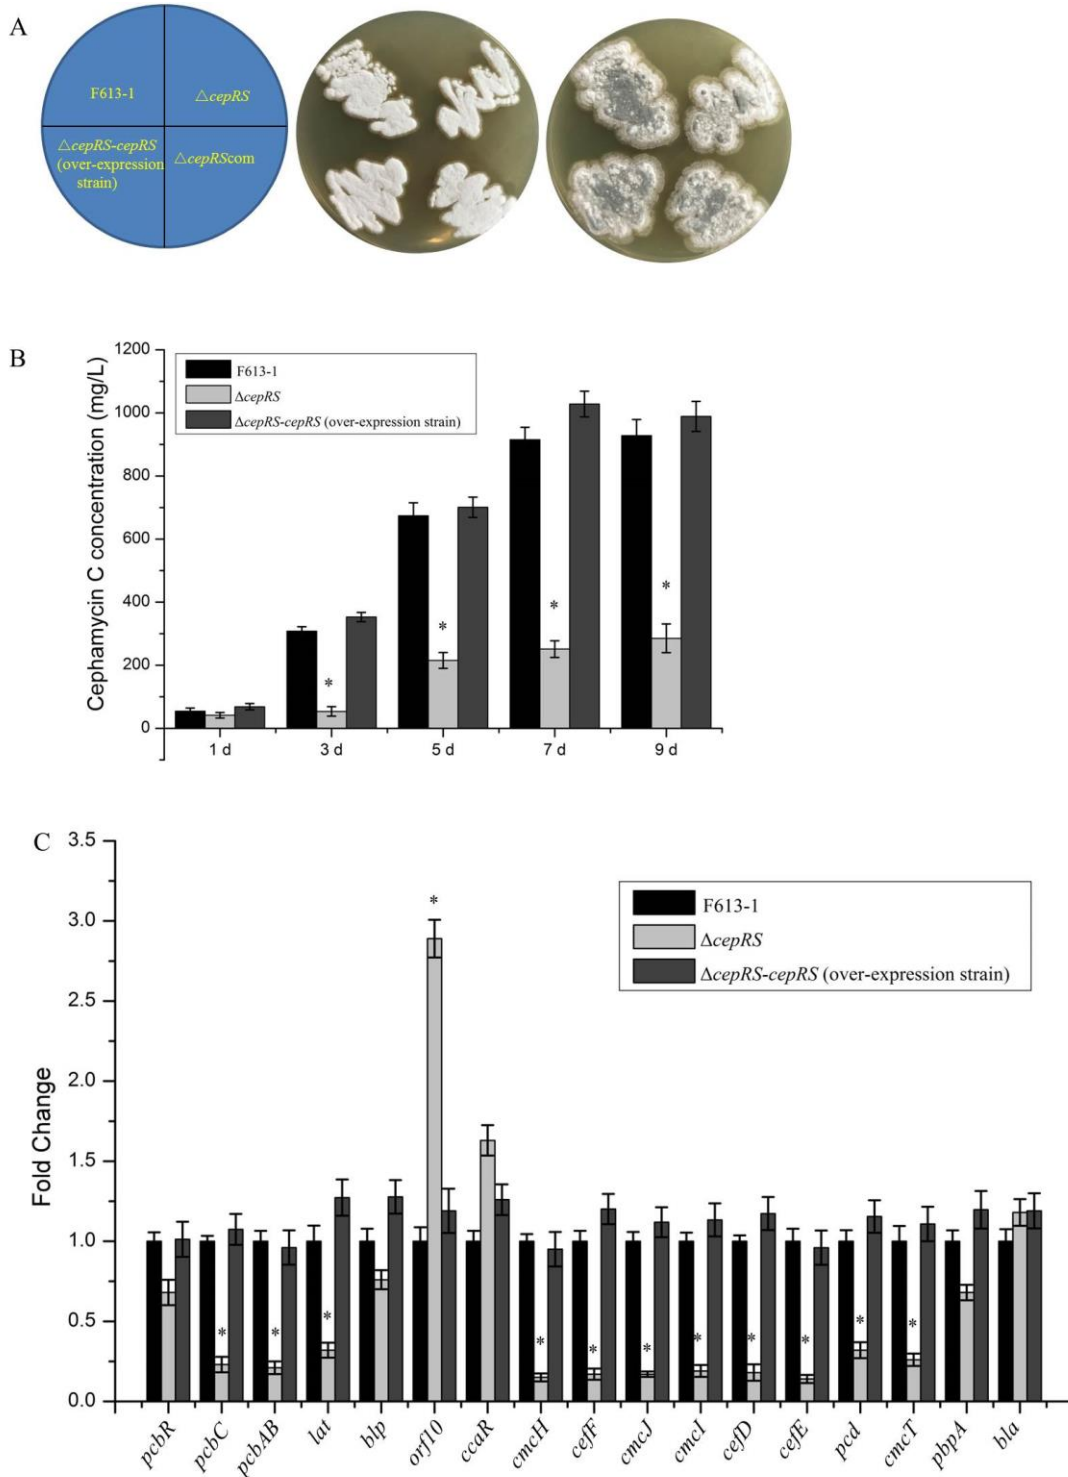

**Figure S4.** A: Phenotype of F613-1,  $\Delta cepRS$ ,  $\Delta cepRScom$  and  $\Delta cepRS-cepRS$  (over-expression strain) on BSCA solid media. B: Cephamycin C obtained in F613-1,  $\Delta cepRS$  and  $\Delta cepRS-cepRS$  (over-expression strain) strains on TSA solid medium. \*, compared with F 613-1,  $P < 0.05$ . Data are the mean  $\pm$  SD of three independent biological experiments. C: Expression of genes in the cephamycin C biosynthetic gene cluster were examined by RT-qPCR between F613-1 (black bars),  $\Delta cepRS$  (grey bars) and  $\Delta cepRS-cepRS$  (over-expression strain) (dark grey bars). Results were normalized for 16S rRNA gene content and are shown as fold change over the F613-1 control. \*, compared with F613-1,  $P < 0.05$ . Data are the mean  $\pm$  SD of three independent biological experiments.

## References:

- He Y, Wang Z, Bai L, Liang J, Zhou X, Deng Z (2010) Two pHZ1358-derivative vectors for efficient gene knockout in *streptomyces*. *Journal of microbiology and biotechnology* 20(4):678-82
- Kieser T, Bibb MJ, Buttner MJ, Chater KF, Hopwood DA (2000) *Practical Streptomyces Genetics*. John Innes Foundation, Norwich, England
- Leite CA, Cavallieri AP, Baptista AS, Araujo ML (2016) Dissociation of cephamycin C and clavulanic acid biosynthesis by 1,3-diaminopropane in *Streptomyces clavuligerus*. *FEMS microbiology letters* 363(1):fzv215
- Qin R, Zhong, C., Zong, G., Fu, J., Pang, X., Cao, G. (2017) Improvement of clavulanic acid production in *Streptomyces clavuligerus* F613-1 by using a *claR* - neo reporter strategy. *Electronic Journal of Biotechnology* 28:41-46
